# Supplementary material for: Probing tissue transglutaminase mediated vascular smooth muscle cell aging using a novel transamidation-deficient Tgm2-C277S mouse model
Source: PubMed Central journal article supplement (PMC8322091; doi:10.1038/s41420-021-00543-8), 2021-07-29
Supplement: 41420_2021_543_MOESM3_ESM.pdf [file 41420_2021_543_MOESM3_ESM.pdf]

Please complete the table below to indicate the contributions of all named authors to the figures.

Figure 1:

|  |
|--|
|  |
|--|

Figure 2:

|  |
|--|
|  |
|--|

Figure 3:

|  |
|--|
|  |
|--|

Figure 4:

|  |
|--|
|  |
|--|

Figure 5:

|  |
|--|
|  |
|--|

Figure 6:

|  |
|--|
|  |
|--|

Signed for and on behalf of the Author(s):

*Lakshmi Santhanam*

Print Name:

|  |
|--|
|  |
|--|

Date:

|  |
|--|
|  |
|--|
